# Supplementary material
Source: PubMed Central journal article supplement (PMC6262777)
Supplement: joces-131-218214-s1.pdf [file joces-131-218214-s1.pdf]

## Supplementary information

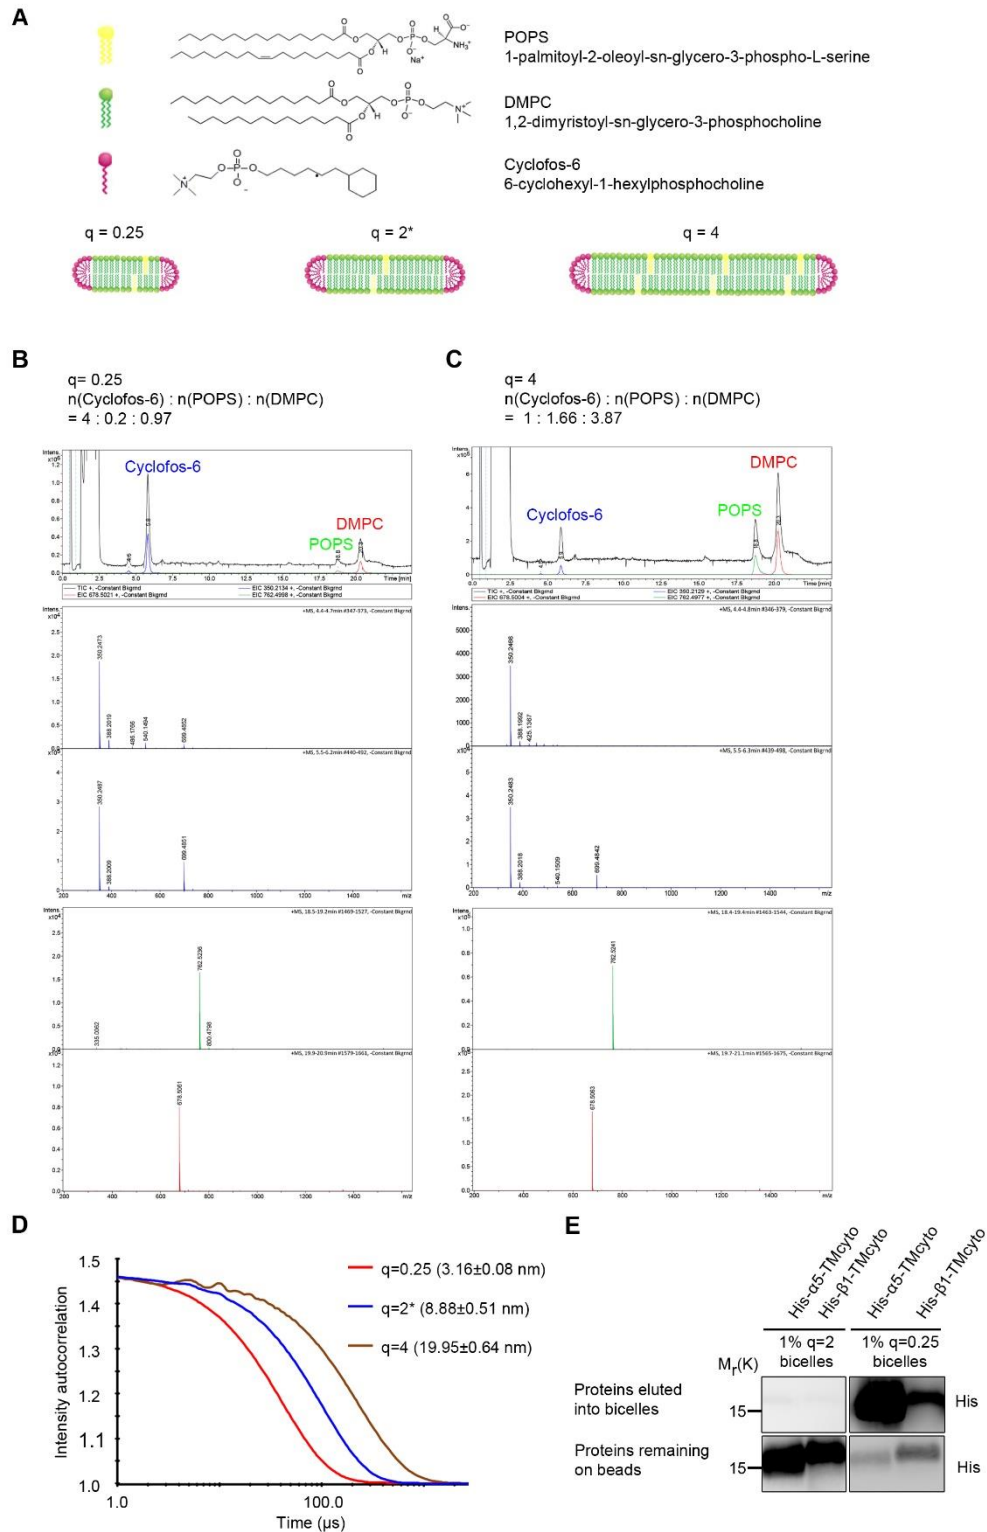

**Figure S1. Lipid composition of bicelles.** (A) Chemical structures of phospholipids used to generate the bicelles and cartoon illustration of architecture of and lipid distribution in bicelles. (B, C) The relative molar ratio of lipids and detergent in  $q=0.25$  (B),  $q=4$  (C) bicelles was

determined by LC-MS. Cyclofos-6 (blue), POPS (green), DMPC (red). **(D)** Dynamic light scattering (DLS) curves of bicelles with different q-values to determine the hydrodynamic radii (nm) of the different bicelles (q=0.25:  $3.16 \pm 0.08$  nm; q=4:  $19.95 \pm 0.64$  nm; q=2\*:  $8.88 \pm 0.51$  nm, mean  $\pm$  s.e.m., n=3). **(E)** Western blot analysis for His-tagged  $\alpha 5$  and  $\beta 1$  integrin TMcyto domains after incorporation into q=0.25 and q=2 bicelles. Proteins were successfully incorporated into q=0.25 bicelles but not into q=2 bicelles.

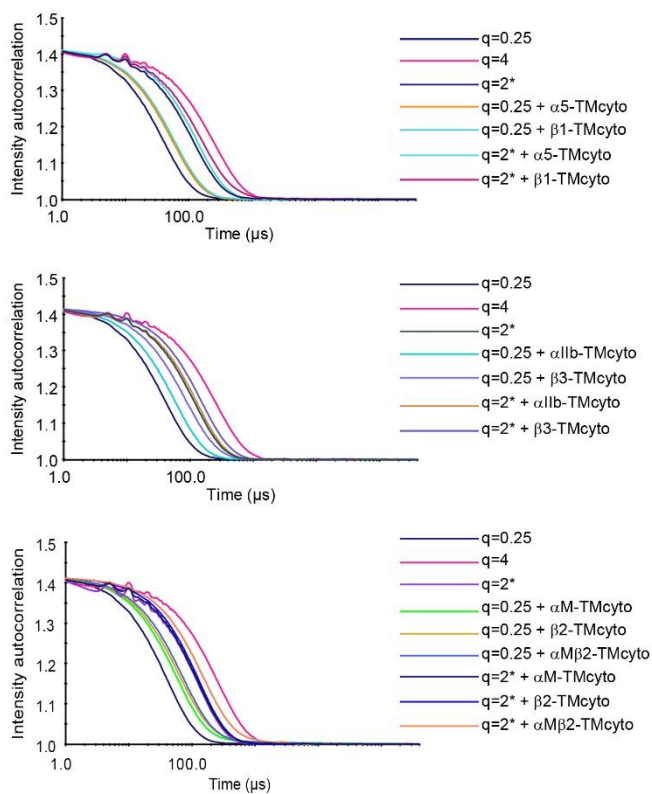

**Figure S2. DLS measurement of bicelles before and after integrin TMcyto domain incorporation.**

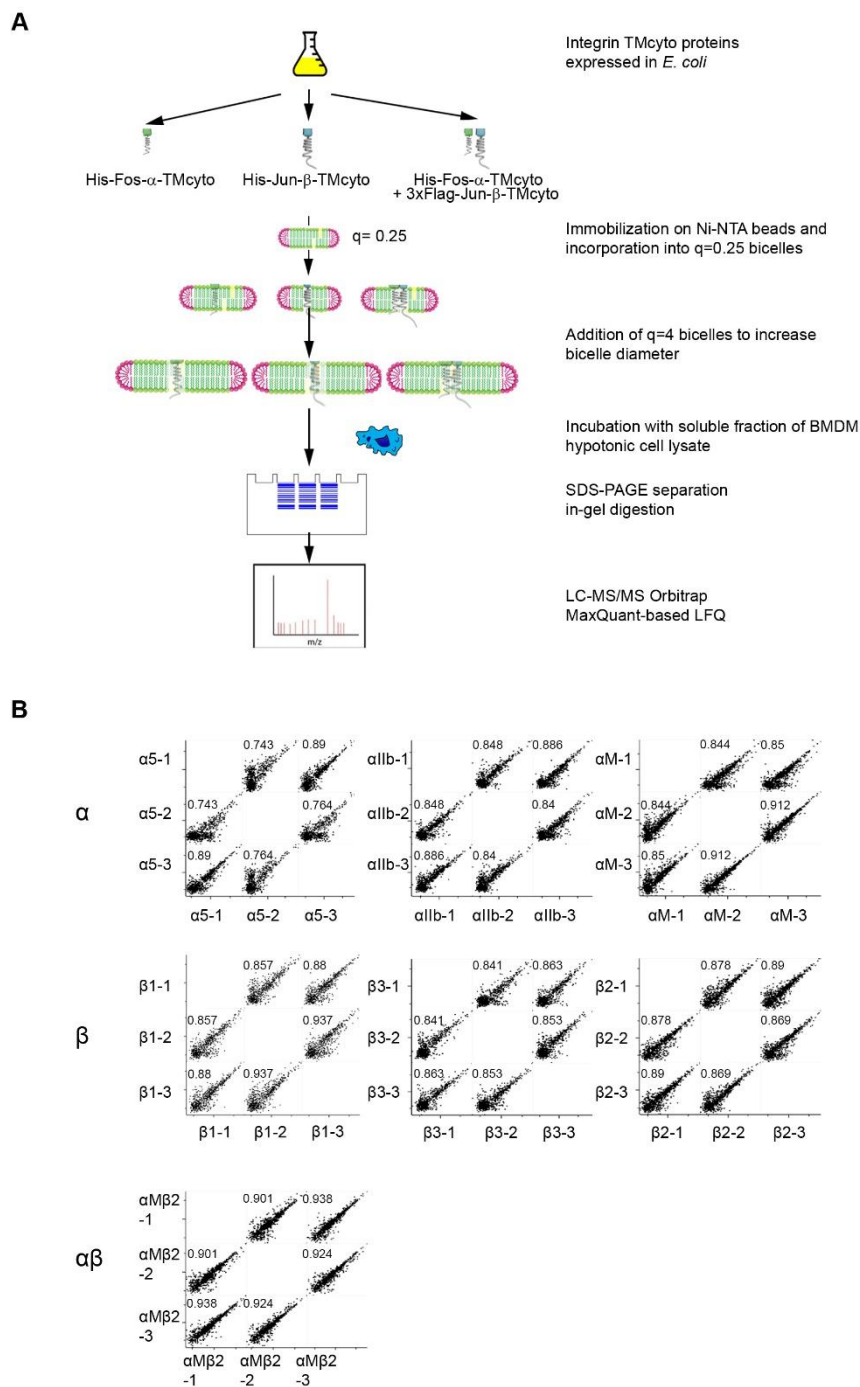

**Figure S3. Workflow for incorporation of recombinant integrin TMcyto domains in bicelles, pull-downs and proteomic analysis.** (A) Purified heterodimeric or monomeric integrin TMcyto domains were immobilized on Ni-NTA beads and incorporated into bicelle solutions (q=0.25). Bicelle size was increased by adding q=4 bicelles to obtain q=2\* bicelles characterized by a hydrodynamic radius of ~10 nm, followed by the pull-down of proteins from hypotonic BMDM lysates. Interactors were identified by LC-MS/MS and analyzed by

MaxQuant LFQ intensity. **(B)** Multi-scatter plot of the protein LFQ intensities shows the reproducibility within the triplicate measurements of the different pull-downs. The indicated values correspond to Pearson correlation.

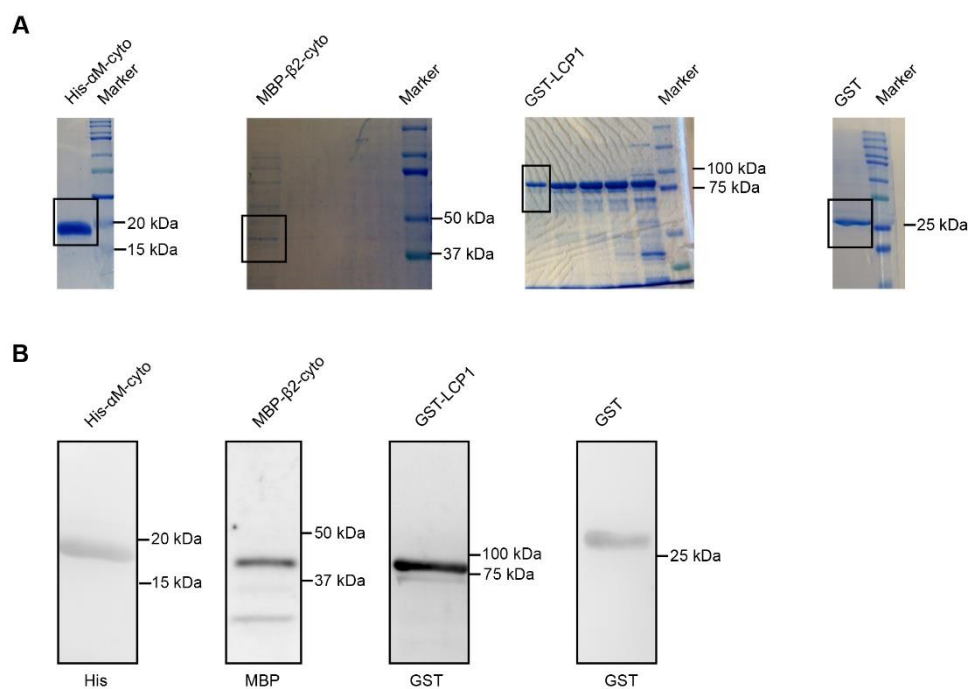

**Figure S4. Expression of recombinant proteins used in pull-down experiments. (A, B)** SDS-PAGE analysis of bacterially expressed and purified His- $\alpha$ M-cyto, MBP- $\beta$ 2-cyto, GST-LCP1, and GST stained either by Coomassie Blue (A) or by western blotting with antibodies against the indicated proteins (B).

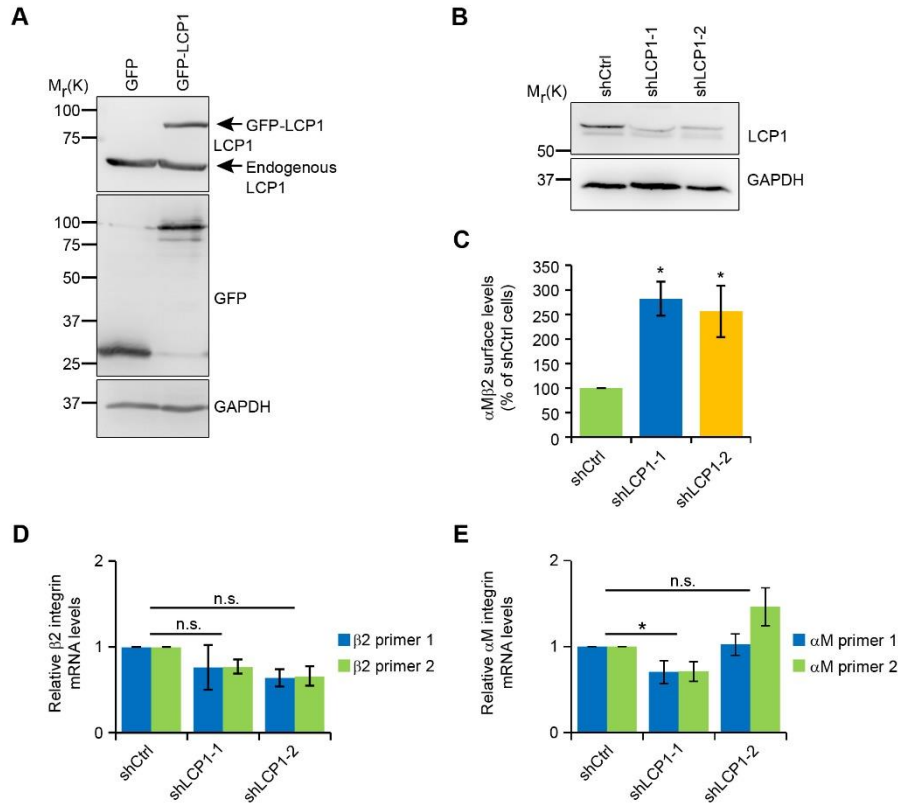

**Figure S5. Regulation of  $\alpha$ M $\beta$ 2 integrin-surface levels by LCP1.** (A) Western blot of GFP and GFP-LCP1 overexpressing PLB985 cells. (B) Western blot analysis of shRNA-mediated depletion of LCP1 in Raw264.7 cells. Cells were infected with shCtrl or two different LCP1 shRNA (shLCP1-1 and shLCP1-2). (C) FACS analysis of  $\alpha$ M $\beta$ 2 surface expression in LCP1-depleted Raw264.7 cells (values are normalized to shCtrl cells; mean $\pm$ s.e.m., n=3, \*  $P < 0.05$ ). (D, E) Quantification of  $\beta$ 2 (D) and  $\alpha$ M integrin (E) mRNA levels in LCP1-depleted Raw264.7 cells determined by quantitative real-time PCR (values are normalized to shCtrl cells; mean $\pm$ s.e.m., n=3, n.s. not significant, \*  $P < 0.05$ ).

| Bicelles-integrin TMcyto   | Hydrodynamic Radius (nm) |
|----------------------------|--------------------------|
| 0.25- $\alpha$ 5           | 4.54 $\pm$ 0.22          |
| 0.25- $\beta$ 1            | 4.58 $\pm$ 0.15          |
| 2*- $\alpha$ 5             | 10.47 $\pm$ 0.65         |
| 2*- $\beta$ 1              | 11.32 $\pm$ 1.29         |
| 0.25- $\alpha$ IIb         | 12.65 $\pm$ 1.67         |
| 0.25- $\beta$ 3            | 6.00 $\pm$ 0.54          |
| 2*- $\alpha$ IIb           | 10.29 $\pm$ 0.44         |
| 2*- $\beta$ 3              | 11.30 $\pm$ 0.77         |
| 0.25- $\alpha$ M           | 4.41 $\pm$ 0.20          |
| 0.25- $\beta$ 2            | 4.93 $\pm$ 0.42          |
| 0.25- $\alpha$ M $\beta$ 2 | 5.15 $\pm$ 0.31          |
| 2*- $\alpha$ M             | 10.05 $\pm$ 0.26         |
| 2*- $\beta$ 2              | 10.25 $\pm$ 0.31         |
| 2*- $\alpha$ M $\beta$ 2   | 11.17 $\pm$ 0.49         |

**Table S1:** Hydrodynamic radii of bicelles after incorporation of indicated integrin  $\alpha$  and  $\beta$  subunits determined by DLS.

**Table S2:** List of all proteins identified in pull-down experiments using bicelle-incorporated  $\alpha$  or  $\beta$  TMcyto domains by mass-spectrometry ( $\alpha$ 5,  $\beta$ 1,  $\alpha$ IIb,  $\beta$ 3,  $\alpha$ M, and  $\beta$ 2).

[Click here to Download Table S2](#)

**Table S3:** List of proteins with significant binding to lipid-incorporated  $\alpha$  or  $\beta$  TMcyto domains. Overlap of proteins significantly binding to  $\alpha$  or  $\beta$  TMcyto across the three different combinations ( $\alpha$ 5 vs  $\beta$ 1;  $\alpha$ IIb vs  $\beta$ 3;  $\alpha$ M vs  $\beta$ 2).

[Click here to Download Table S3](#)

**Table S4:** List of proteins favoring binding to clasped  $\alpha$ M $\beta$ 2-TMcyto.

[Click here to Download Table S4](#)
